# Supplementary material
Source: PubMed Central journal article supplement (PMC7612761)
Supplement: EMS145032-supplement-Supplementary_material.pdf [file EMS145032-supplement-Supplementary_material.pdf]

## KEY RESOURCES TABLE

| REAGENT or RESOURCE                                                     | SOURCE                | IDENTIFIER       |
|-------------------------------------------------------------------------|-----------------------|------------------|
| <b>Antibodies</b>                                                       |                       |                  |
| Mouse anti-Flag (M2)                                                    | Sigma                 | F1804            |
| anti HA (12CA5)                                                         | Roche                 | 11666606001      |
| Anti-Myc Tag (4A6)                                                      | Merck millipore       | 05-724           |
| anti PK Anti-V5 Tag (SV5-Pk1)                                           | Bionova               | MCA1360          |
| anti-Mouse-HRP                                                          | Taper                 | T03.PI2000M001   |
| <b>Chemicals, Peptides, and Recombinant Proteins</b>                    |                       |                  |
| RNase A                                                                 | Sigma                 | R5503            |
| Shortcut RNase III                                                      | NEB                   | M0245            |
| Proteinase K                                                            | Roche                 | 03115852001      |
| Hydroxyurea                                                             | IbianTechnologies     | HDU0250          |
| Metyl methanesulfonate                                                  | Sigma                 | 129925           |
| Camptothecin                                                            | Sigma                 | C9911            |
| Propidium iodide                                                        | Sigma                 | P4170            |
| Trimetilpsoralen                                                        | Sigma                 | P8399            |
| Phos-tag acrylamide                                                     | Rafer                 | 300-93523        |
| Complete Protease Inhibitor-EDTA free                                   | Roche                 | 11873580001      |
| Alfa-factor Mating Pheromone                                            | Insight Biotechnology | N/A              |
| Spermine                                                                | Sigma                 | S1141            |
| Spermidine                                                              | Sigma                 | S2501            |
| QBT                                                                     | QIAGEN                | 19054            |
| QC                                                                      | QIAGEN                | 19055            |
| QF                                                                      | QIAGEN                | 19056            |
| QIAGEN Genomic-Tips 100/G                                               | QIAGEN                | 10243            |
| QIAGEN Genomic-Tips 20/G                                                | QIAGEN                | 10223            |
| Benzoylated Naphthoylated DEAE-Cellulose                                | Sigma                 | B6385            |
| Poly-Prep chromatography column                                         | Biorad                | 7311550          |
| Amicon Ultra-0.5 ml 100K                                                | Merck millipore       | UFC510096        |
| <b>Deposited Data</b>                                                   |                       |                  |
| CGS data                                                                | GEO                   | GSE156480        |
| <b>Experimental Models: Organisms/Strains</b>                           |                       |                  |
| A full list of yeast strains used in this study is provided in Table S1 | This paper            | N/A              |
| <b>Oligonucleotides</b>                                                 |                       |                  |
| 5'-GGGTGAAGCGTGATGACTATTTACCACAAGG-3'                                   | This paper            | pol2-S430DFw     |
| 5'-CCTTGTGGTAAATAGTCATCACGCTTCACCC-3'                                   | This paper            | pol2-S430DRev    |
| 5'-GGGTGAAGCGTGATGCTTATTTACCACAAGG-3'                                   | This paper            | pol2-S430AFw     |
| 5'-CCTTGTGGTAAATAAGCATCACGCTTCACCC-3'                                   | This paper            | pol2-S430ARev    |
| 5'-GGGTTAAGAGAGACGACTACTTGCCACAAGG-3'                                   | This paper            | pol2-S430DFw-oc  |
| 5'-CCTTGTGGCAAGTAGTCGTCTCTCTTAACCC-3'                                   | This paper            | pol2-S430DRev-oc |
| 5' GGGTTAAGAGACGACGCTTACTTGCCACAAGG 3'                                  | This paper            | pol2-S430AFw-oc  |
| 5' CCTTGTGGCAAGTAAGCGCAGTCTCTTAACCC 3'                                  | This paper            | pol2-S430ARev-oc |
| <b>Recombinant DNA</b>                                                  |                       |                  |
| pRS415-POL2                                                             | Herr lab              | N/A              |
| pRS415-pol2-S430D                                                       | This paper            | N/A              |
| pRS415-pol2-S430A                                                       | This paper            | N/A              |
| pAJ6                                                                    | Yeeles lab            | N/A              |
| pAJ6-pol2-S430D                                                         | This paper            | N/A              |

|                                                                                                      |                               |     |
|------------------------------------------------------------------------------------------------------|-------------------------------|-----|
| pAJ6-pol2-S430A                                                                                      | This paper                    | N/A |
| <b>Software and Algorithms</b>                                                                       |                               |     |
| R version 3.6.1 (2019-07-05) -- "Action of the Toes"<br>Platform: x86_64-apple-darwin15.6.0 (64-bit) | R Core Team 2013              | N/A |
| Repliscope version '1.1.0'                                                                           | Muller et al. 2014            | N/A |
| Bowtie2 version 2.3.5.1                                                                              | Langmead and Salzberg<br>2012 | N/A |
| SAMtools version 1.9 (htslib 1.9)                                                                    | Li et al. 2009                | N/A |
| Bedtools version 2.29.0                                                                              | Quinlan and Hall 2010         | N/A |
| Deeptools version 3.4.3                                                                              | Ramirez et al. 2014           | N/A |
| Bedgraphtobigwig version 2.8 (bbi version 4)                                                         | Kent et al. 2010              | N/A |

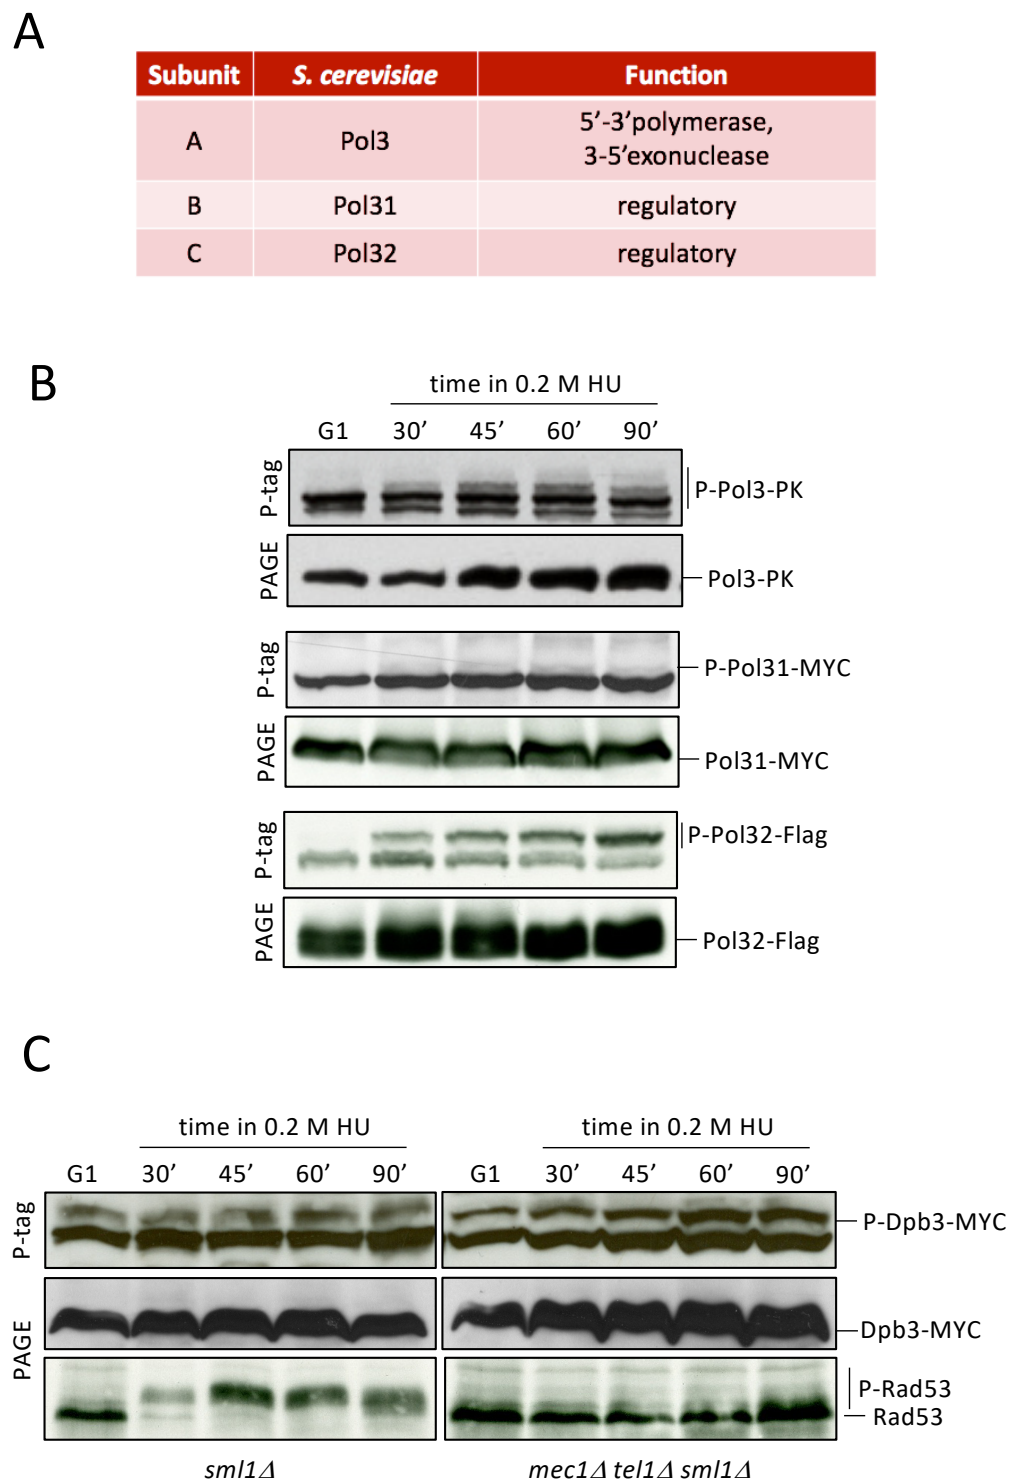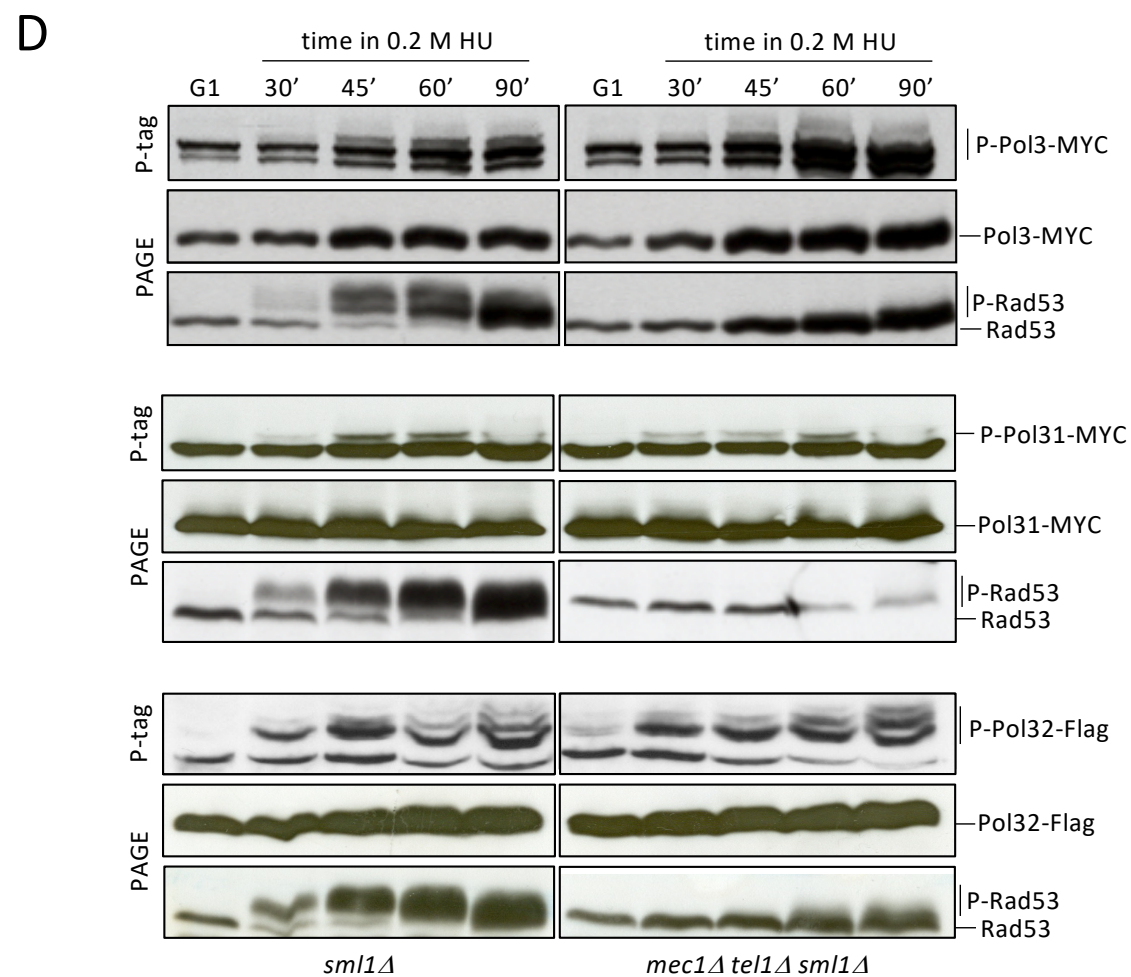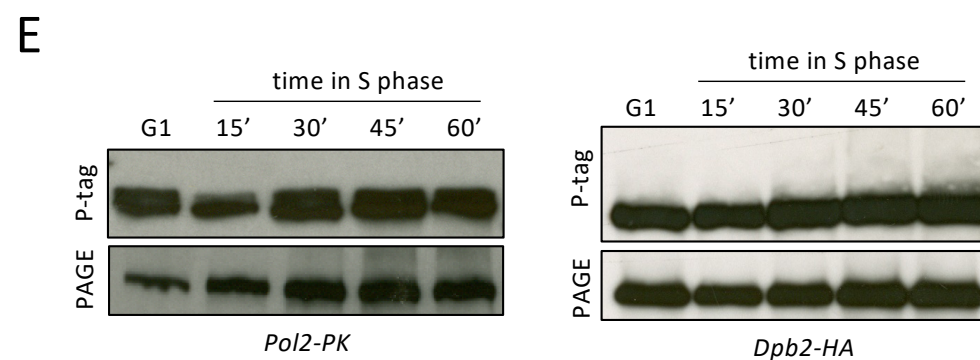

Figure S1

**Figure S1. DNA Polymerase  $\delta$  and DNA polymerase  $\epsilon$  subunit phosphorylation in cells experiencing replication stress, Related to Figure 1.** (A) DNA polymerase  $\delta$  subunits. (B) Western blot analysis of the phosphorylation of Pol $\delta$  subunits. Proteins were extracted from cells expressing epitope-tagged Pol3, Pol31 or Pol32 released from an alpha-factor induced block (G1) into a synchronous S-phase in the presence of 0.2 M hydroxyurea (HU) and subject to electrophoresis in the presence (P-tag) or absence (PAGE) of PhosTag reagent. (C) Western blot analysis of the phosphorylation of Dpb3 in *sm11 $\Delta$*  and *mec1 $\Delta$  tel1 $\Delta$  sm11 $\Delta$*  cells. (D) Western blot analysis of the phosphorylation of Pol3, Pol31 and Pol32 in *sm11 $\Delta$*  and *mec1 $\Delta$  tel1 $\Delta$  sm11 $\Delta$*  cells. Checkpoint activation can be inferred from Rad53 phosphorylation status assayed by western blotting with EL7 antibodies. (E) Western blot analysis of the phosphorylation of Pol2 and Dpb2 in cells released from a G1 block into an unperturbed S-phase.

A

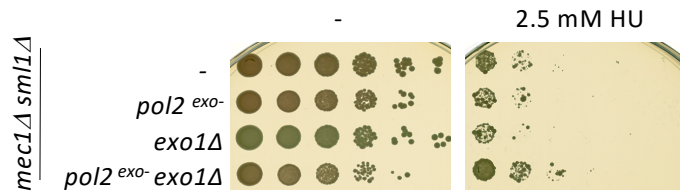

B

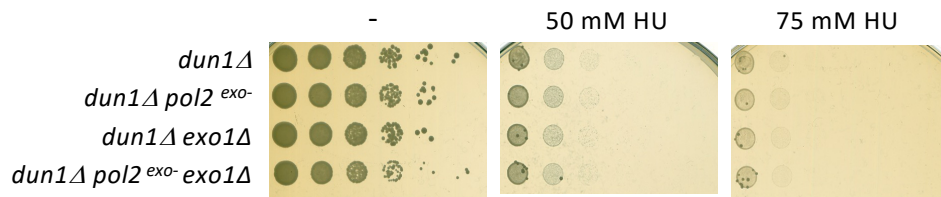

C

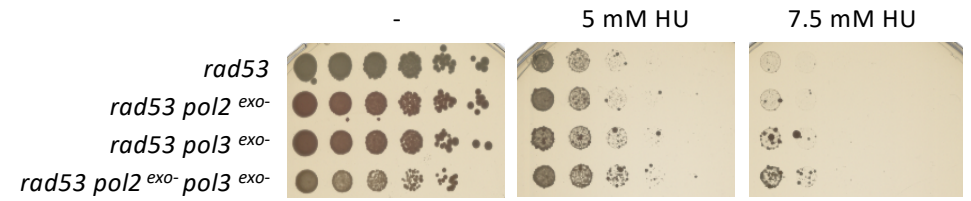

D

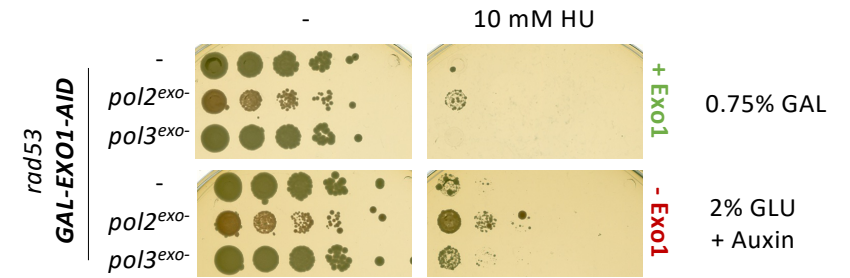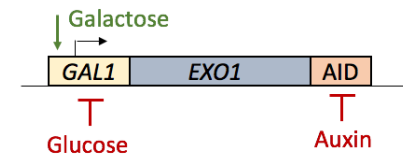

Figure S2

**Figure S2. Contribution of the exonuclease activities of DNA Polymerase  $\epsilon$  and DNA polymerase  $\delta$  to the HU sensitivity of checkpoint-deficient cells, Related to Figure 3.** (A) Serial dilutions of *mec1 $\Delta$  sml1 $\Delta$* , *mec1 $\Delta$  sml1 $\Delta$  pol2-4*, *mec1 $\Delta$  sml1 $\Delta$  exo1 $\Delta$*  and *mec1 $\Delta$  sml1 $\Delta$  pol2-4 exo1 $\Delta$*  cells plated in absence (-) or presence of 2.5 mM HU. (B) Serial dilutions of *dun1 $\Delta$* , *dun1 $\Delta$  pol2-4*, *dun1 $\Delta$  exo1 $\Delta$*  and *dun1 $\Delta$  pol2-4 exo1 $\Delta$*  cells plated in absence (-) or presence of 50 or 75 mM HU. (C) Serial dilutions of *rad53*, *rad53-K227A pol2-4*, *rad53-K227A pol3-01* and *rad53-K227A pol2-4 pol3-01* cells plated in absence (-) or presence of 5 or 7.5 mM HU. (D) Serial dilutions of *rad53 GAL1-HA-exo1-AID*, *rad53-K227A GAL1-HA-exo1-AID pol2-4* and *rad53-K227A GAL1-HA-exo1-AID pol3-01* cells plated on YP supplemented with 0.025% raffinose and 0.004% ethanol in absence or presence of 10 mM HU and 0.75% Galactose (Exo1 expression) or 2% Glucose and 500  $\mu$ M Auxin (Exo1 repression). A schematic diagram of the genetic strategy used to modulate Exo1 expression levels is shown.

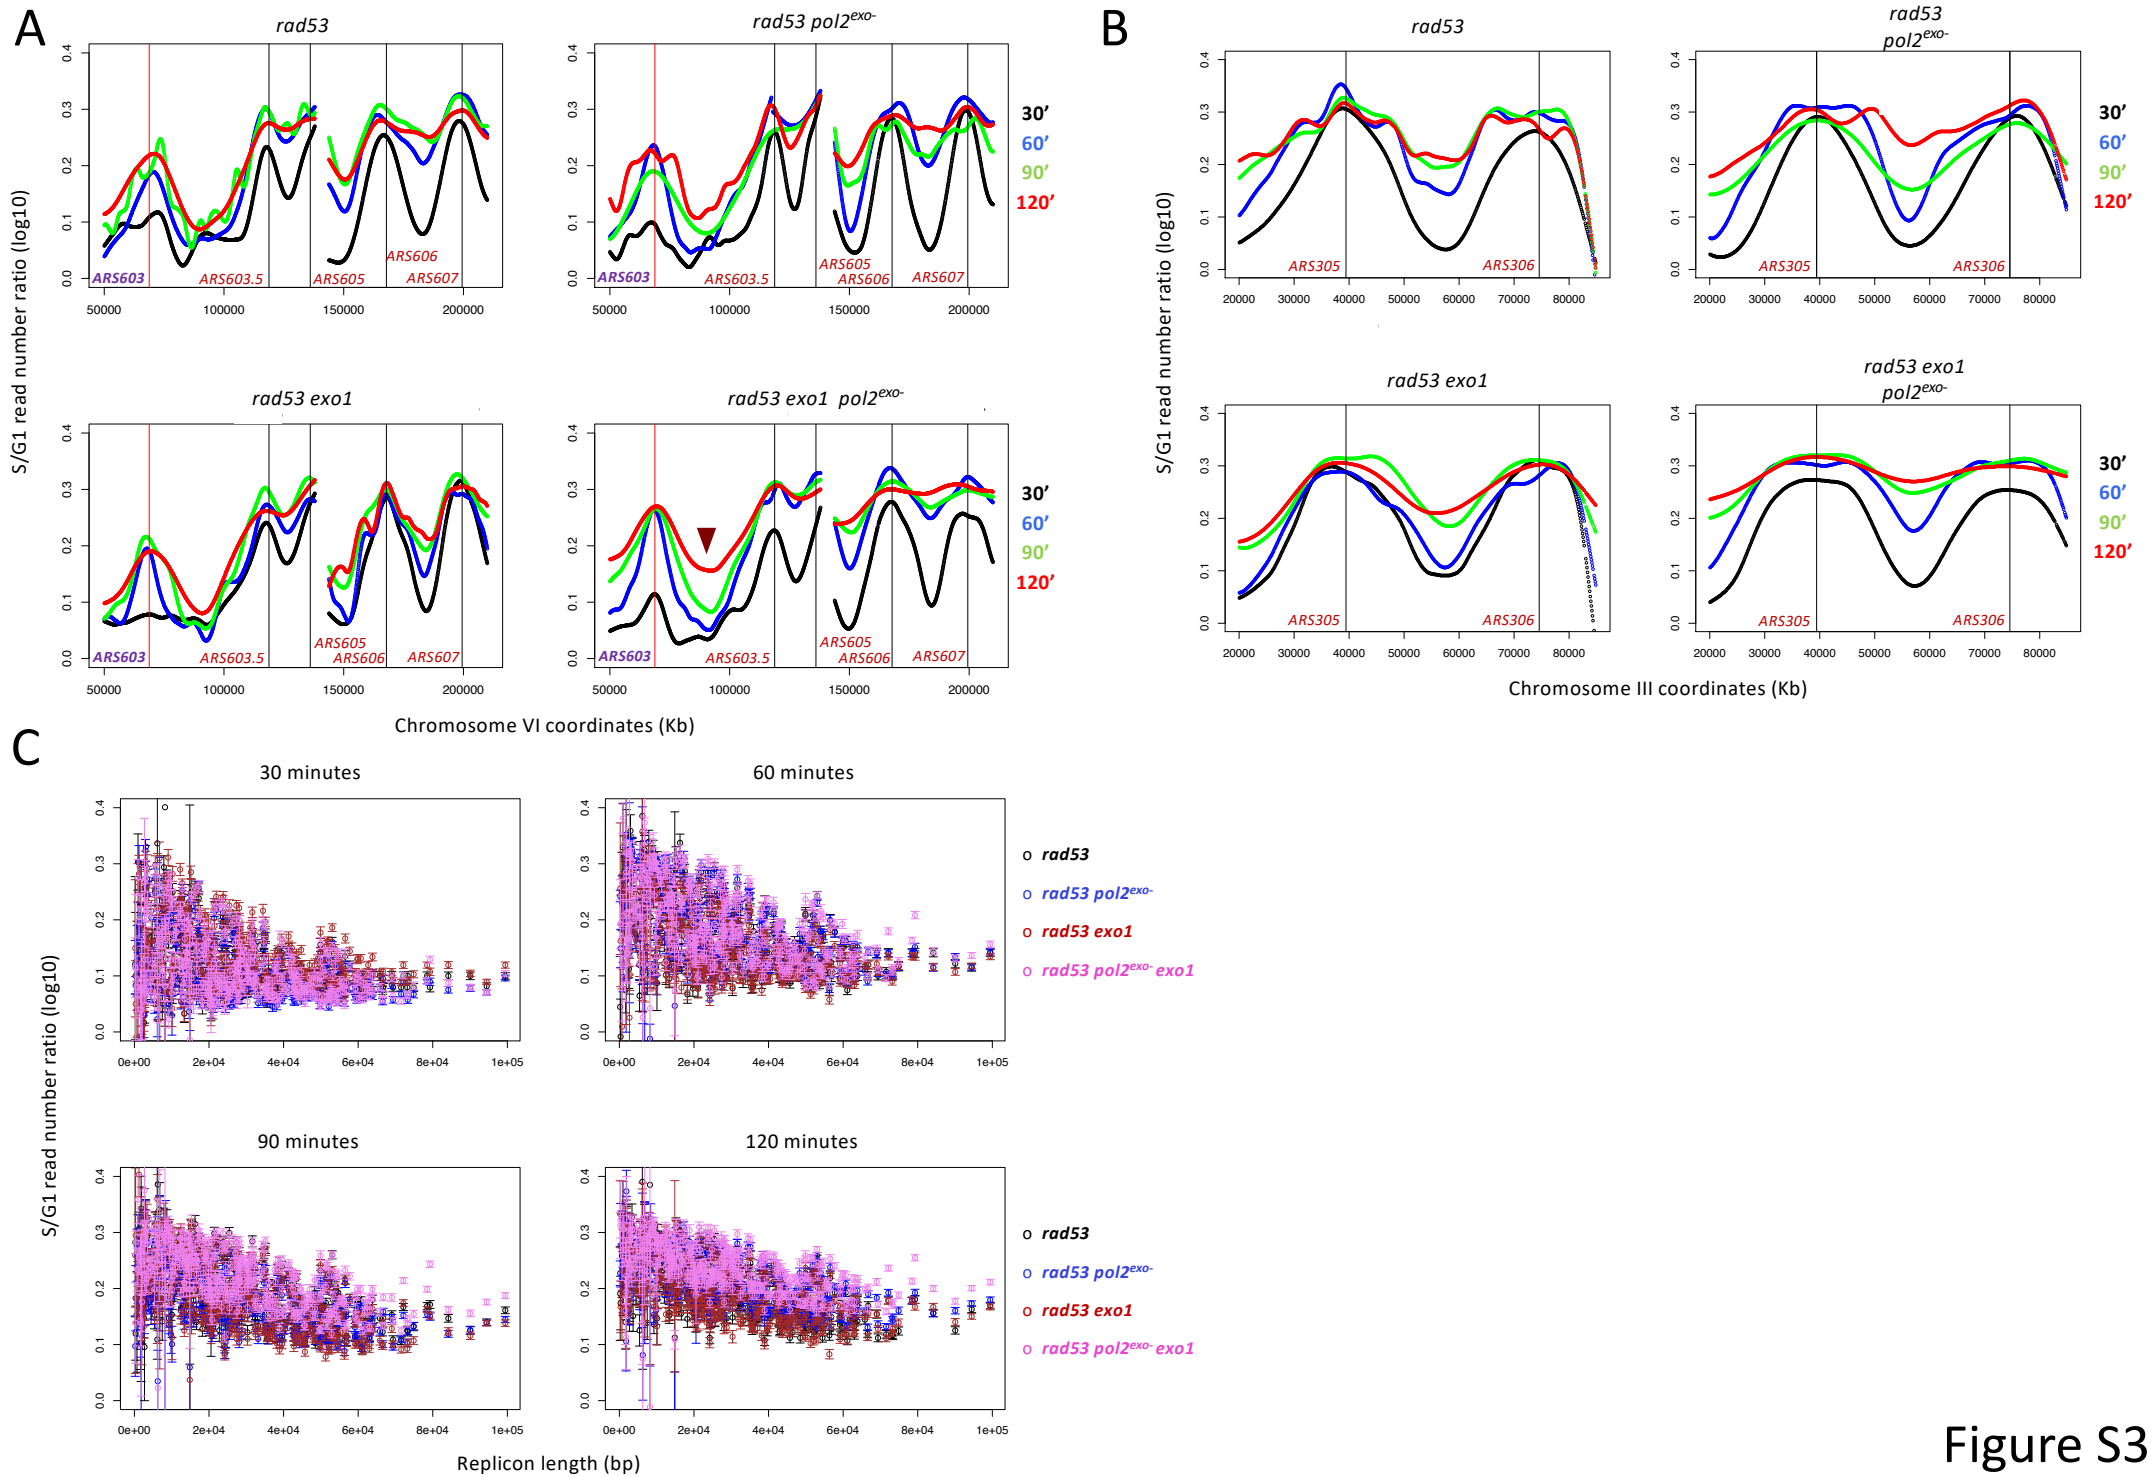

Figure S3

**Figure S3. Contribution of the exonuclease activity of Pol $\epsilon$  and Exo1 to stalled fork collapse, Related to Figure 3.** (A) CGS analysis of fork progression as in Figure 3C. A 150-Kb genomic region on chromosome VI containing early origins *ARS603.5*, *ARS605*, *ARS606* and *ARS607* and the late origin *ARS603* (in purple color) is shown. A red arrowhead evidences increased replication completion at the 45-Kb segment between *ARS603* and *ARS603.5* in *rad53-K227A exo1 $\Delta$  pol2-4* cells. (B) CGS analysis of fork progression as in the experiment shown in Figure 3C. A 60-Kb region genomic region on chromosome III containing the early origins *ARS305* and *ARS306* is shown. (C) Plots representing mean and standard error of S/G1 read enrichment ratios (log<sub>10</sub>) of regions shown in Figure 3D ordered by replicon length. Ratios are shown for the different time points after release in HU for *rad53-K227A*, *rad53-K227A pol2-4*, *rad53-K227A exo1 $\Delta$*  and *rad53-K227A pol2-4 exo1 $\Delta$*  cells.



**A**

| Rad53 consensus motif (+1 or +2 Ψ) |               |
|------------------------------------|---------------|
| Pol2 Phosphopeptides               | a.a. position |
| YNTphosLSNNYALSAQQLLNASK           | 25            |
| YNTLSphosNNYALSAQQLLNASK           | 27            |
| YNTLSNNYALSAQQLLNASK               | 33            |
| RDSphosYLPQGSQGLK                  | 430           |
| DCASphosCDFNRPGK                   | 667           |
| VKVSphosEIVER                      | 753           |
| AMILPSSphosKEEGK                   | 957 or 958    |
| STSpHosITTAR                       | 1066          |
| LGSphosAIQK                        | 1152          |
| IITIPAALQGVSpHosNPVPR              | 1168          |
| DQLFGNTNSSphosR                    | 1299 or 1300  |
| SphosALGSMIR                       | 1304          |
| SALGSphosMIR                       | 1308          |
| TSpHosNPAGGQLFK                    | 1390          |
| DAVINSpHosPSEFVHDAFSDALNVLR        | 1774          |
| LNSphosGTQRPTQIVNVK                | 1976          |

**B**

| Rad53 consensus motif (+1 or +2 Ψ) |               |
|------------------------------------|---------------|
| Dpb2 Phosphopeptides               | a.a. position |
| MFGSpHosGNVLPVK                    | 4             |
| TphosDDDENSSDDEMPIAADSSLQNVLSPPMR  | 115           |
| TDDDENSSDDEMPIAADSSLQNVLSSpHosPMR  | 141           |
| QNVLSSpHosPMR                      | 141           |
| DEYKQPFKPESpHosSK                  | 161           |
| VINASphosQQQR                      | 176           |
| NENFQNSDMFNPLSSphosMVSLQNELSNTNR   | 246           |
| QQQSSSpHosMITPIK                   | 265           |
| QQQSSMSpHosITPIK                   | 267           |
| QQQSSMSITphosPIK                   | 269           |
| VINPGSpHosFIHNR                    | 663           |

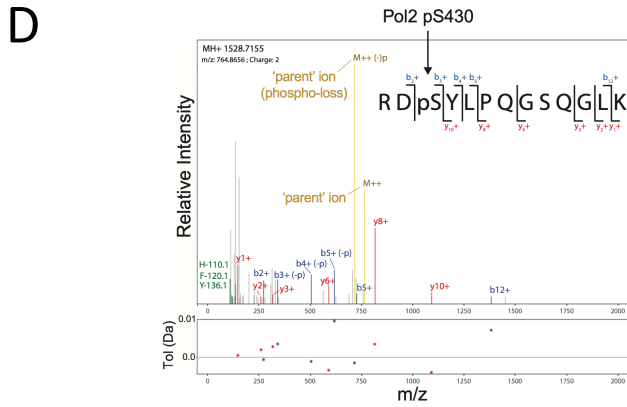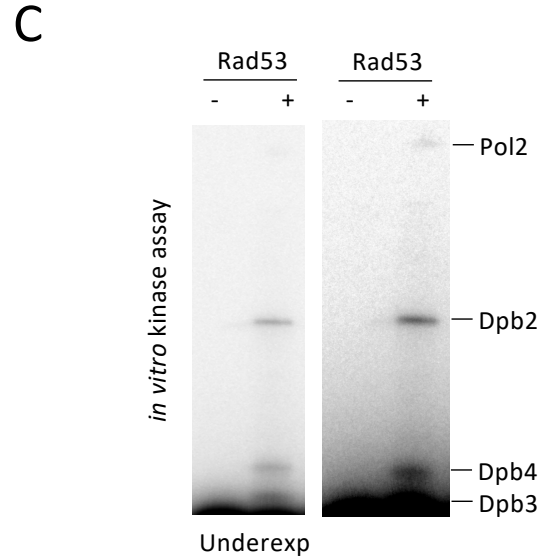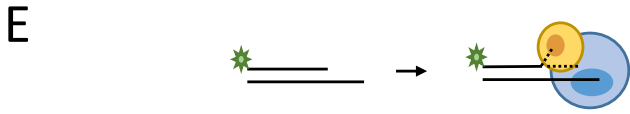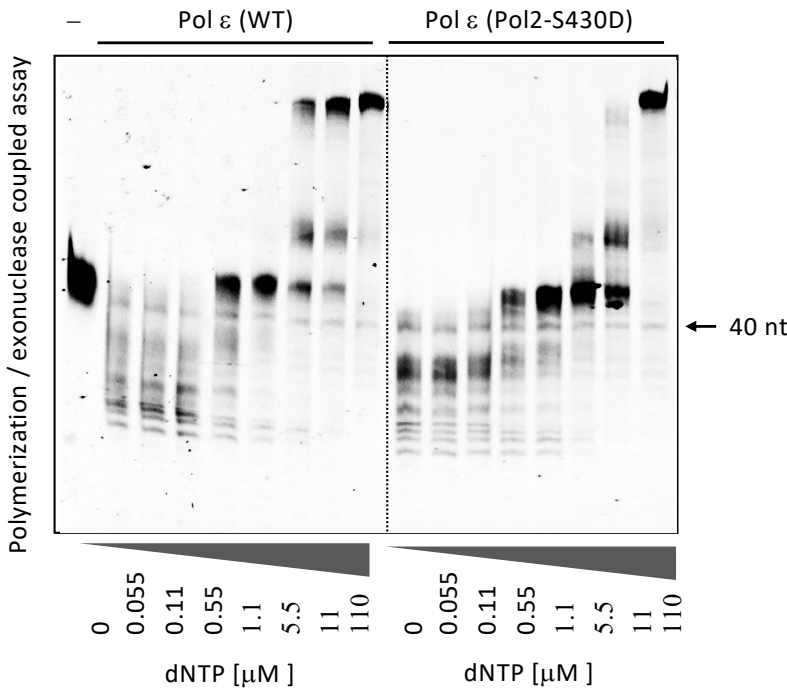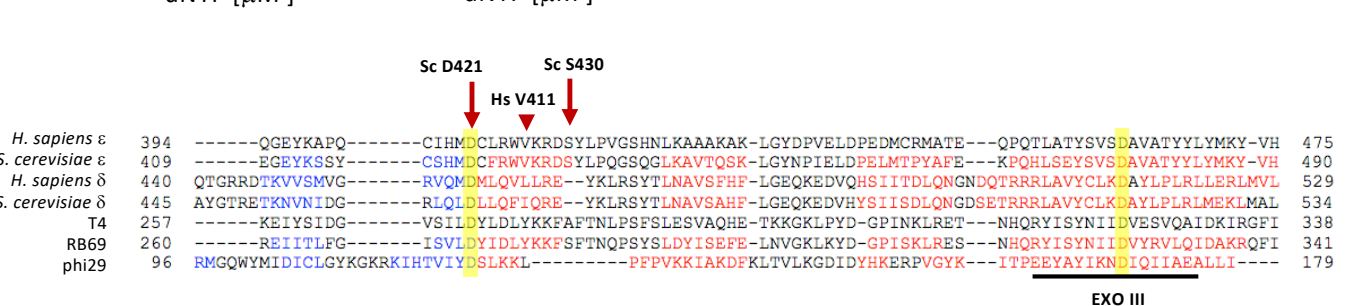

Figure S4

**Figure S4. Analysis of Pol $\epsilon$  residues phosphorylated in cells experiencing replication stress, Related to Figure 4.** (A-B) Phosphopeptides identified by mass spectrometry in Pol2 (A) and Dpb2 (B) immunoprecipitates from cells experiencing replication stress. Peptides containing phosphoserines or phosphothreonines within Rad53 consensus motifs are highlighted in salmon. (C) *In vitro* kinase assay. Radiogram of a protein gel with reactions in which purified Pol $\epsilon$  was incubated in the absence (-) or presence (+) of Rad53 and radiolabeled ATP. Incorporation of hot ATP by Dpb3 was also observed in underexposed gels. (D) Peptide Spectrum Match (PSM) for a phosphopeptide corresponding to Pol2 phosphorylation at S430. Fragment ion match tolerance is set to 0.01 Daltons. (-p) ion fragments denote the neutral loss of the phosphogroup. (E) Polymerase/exonuclease coupled assays performed with WT and S430D Pol $\epsilon$  variants. (F) Detailed view of the location of S430 with respect to the primer strand and the exonucleolytic active site. S430 is located at the tip of an  $\alpha$ -helix that also contains D421 (the orthologous residue influences partitioning in Phi29 DNA polymerase) and V426 (mutated in human cancer). S430 is next to Y431, a residue of unclear function that is in proximity to the major groove of the nascent DNA duplex and that could play a role during partitioning. This area of the structure is adjacent to the  $\beta$ -hairpin loop implicated in Pol $\delta$  partitioning (shown for reference in transparent red) that is dramatically shorter in Pol $\epsilon$  (orange) and lines the channel that the primer strand (magenta) needs to traverse in order to relocate to the exonuclease active site (brown arrow). The surface of the exonuclease domain is shown in transparent green. Relevant residues are shown as sticks. (G) Sequence alignment of a portion of the exonuclease domain of B family polymerases. Exonuclease domains were aligned using Clustal Omega 1.2.0. Conserved non-catalytic (Sc D421) and catalytic aspartates are evidenced by yellow boxes. The positions of Sc D412, Hs V411 and Sc S430 are indicated.  $\alpha$ -helices and  $\beta$ -sheets are depicted in red and blue, respectively.

A

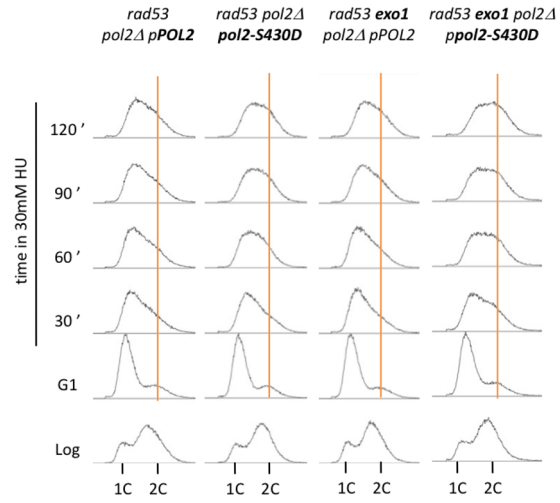

B

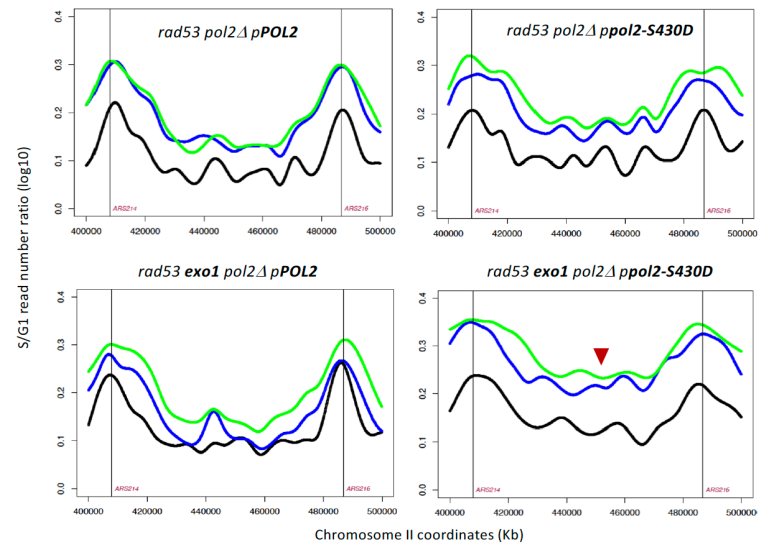

C

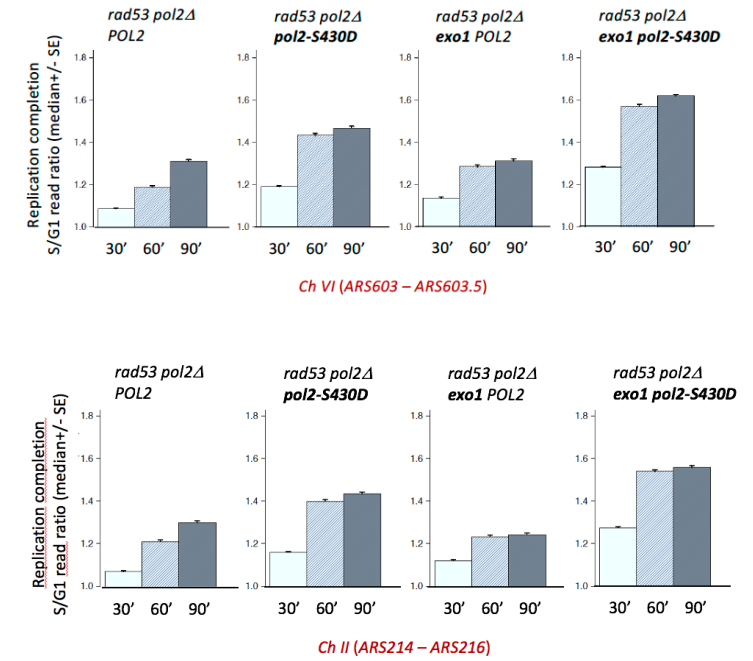

D

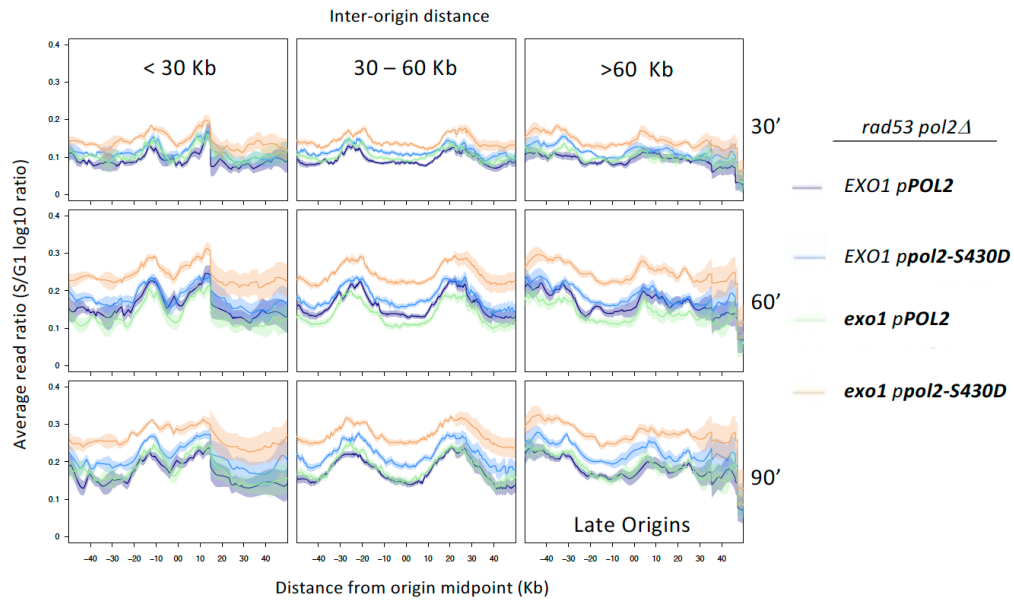

E

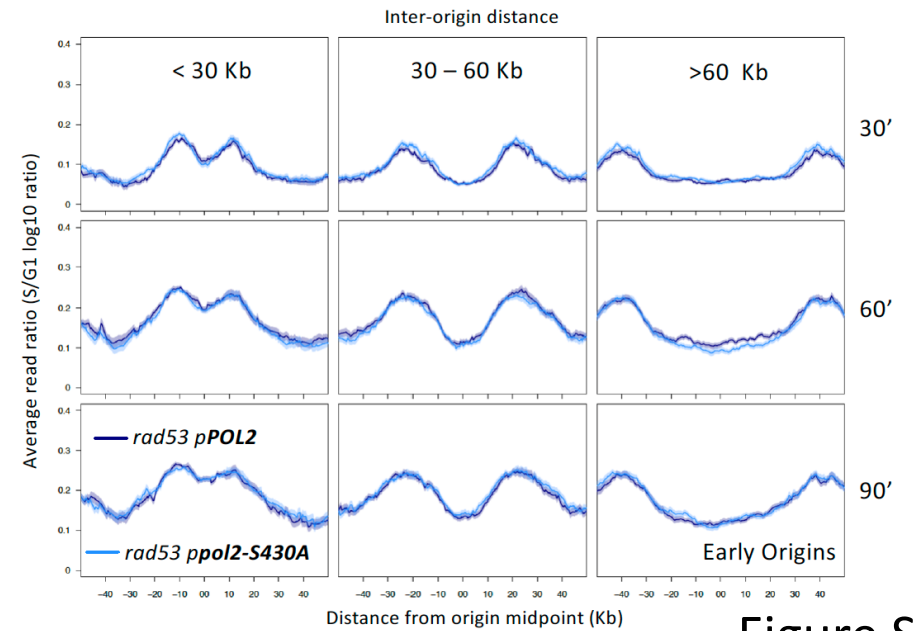

Figure S5

**Figure S5. Pol2 serine 430 phosphomimetic substitution influences bulk genome replication under stress conditions, Related to Figure 5.** (A) Flow cytometry analysis of logarithmically growing (Log) *rad53-K227A pol2 $\Delta$  pRS415-POL2*, *rad53-K227A pol2 $\Delta$  pRS415-pol2-S430D*, *rad53-K227A exo1 $\Delta$  pol2 $\Delta$  pRS415-POL2* and *rad53-K227A exo1 $\Delta$  pol2 $\Delta$  pRS415-pol2-S430D* cells blocked in G1 by alpha-factor treatment (G1) and released into S-phase in the presence of 30 mM HU. Vertical orange bars mark 2C DNA contents. (B) CGS analysis of fork progression as in the experiment shown in Figure 5C. A 120-Kb genomic region on chromosome II containing *ARS214* and *ARS216* early replication origins (marked by vertical black lines) is shown. A red arrowhead evidences increased replication completion in *rad53-K227A exo1 $\Delta$  pol2 $\Delta$  pRS415-pol2-S430D* cells. (C) Histogram plots showing replication completion (overall S/G1 read ratios between flanking origins) of the chromosomal regions between *ARS603/ARS603.5* and *ARS214/ARS216* shown in the CGS experiment on Figure 5C and S5B. (D) Average read ratios across genomic regions categorized by inter-origin distance between dormant and late-firing origins corresponding to the CGS experiment shown in Figure 5C. (E) Average read ratios across genomic regions categorized by inter-origin distance between early origins in *rad53-K227A  $\Delta$  pol2 $\Delta$  pRS415-POL2* and *rad53-K227A  $\Delta$  pol2 $\Delta$  pRS415-pol2-S430A* cells blocked in G1 by alpha-factor treatment (G1) and released into S-phase in the presence of 25 mM HU for the indicated times.

**A**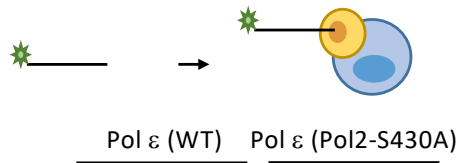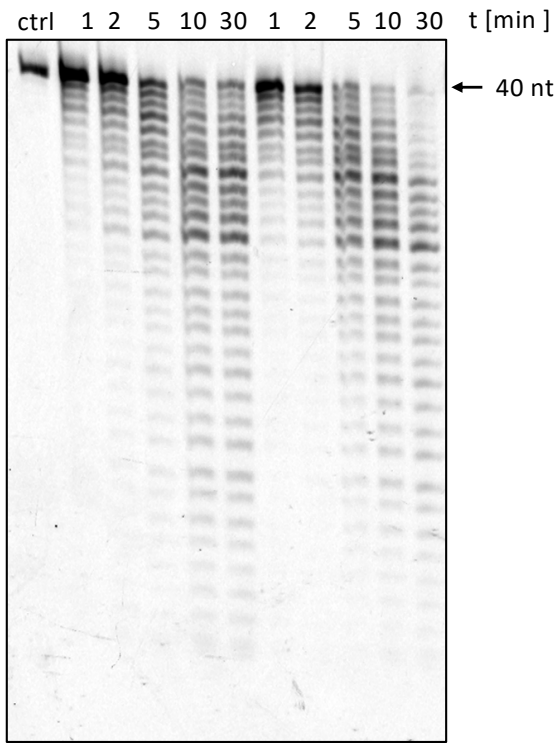

ssDNA exonuclease assay

**B**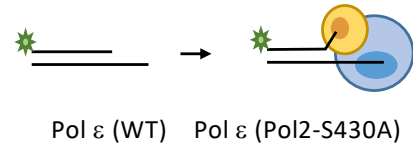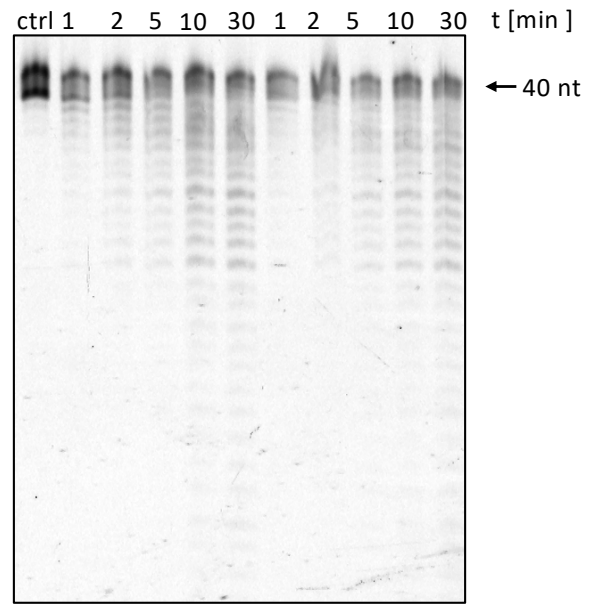

dsDNA exonuclease assay

**C**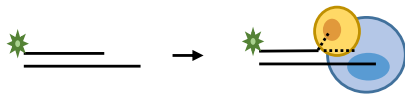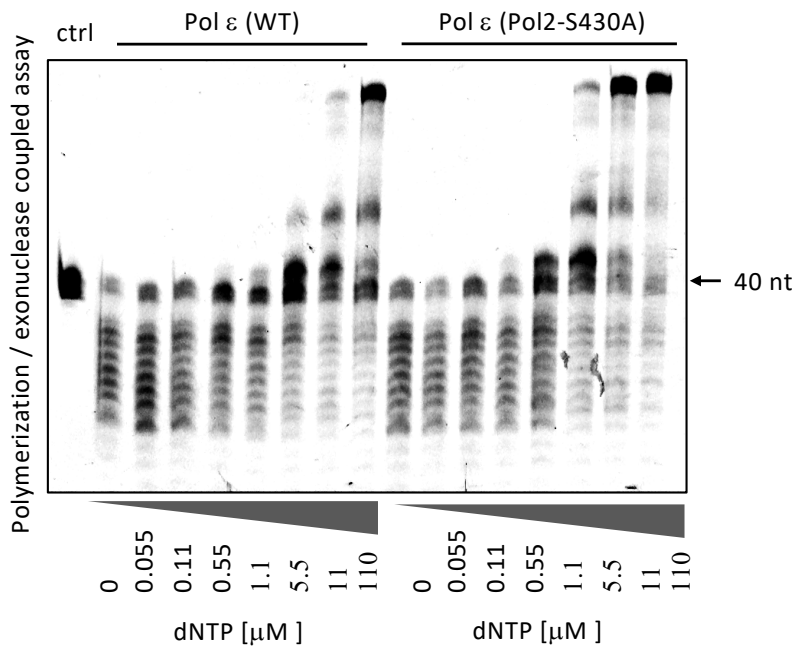

Figure S6

**Figure S6. Non-phosphorylatable Pol2-S430A *in vitro* exonuclease activity, Related to Figure 6.** (A-  
B) Single strand (A) and double strand (B) exonuclease assays performed with WT and S430A Polε  
variants. (C) Polymerase/exonuclease coupled assays performed with WT and S430A Polε.

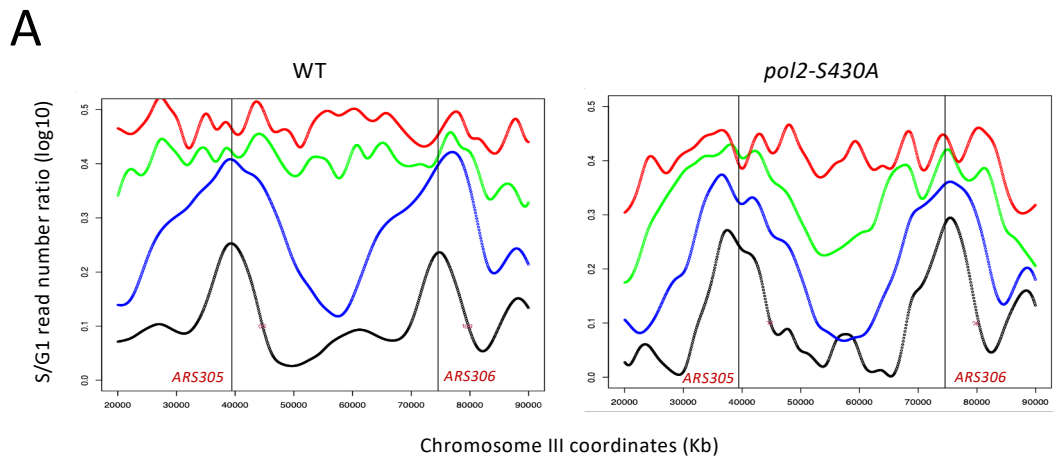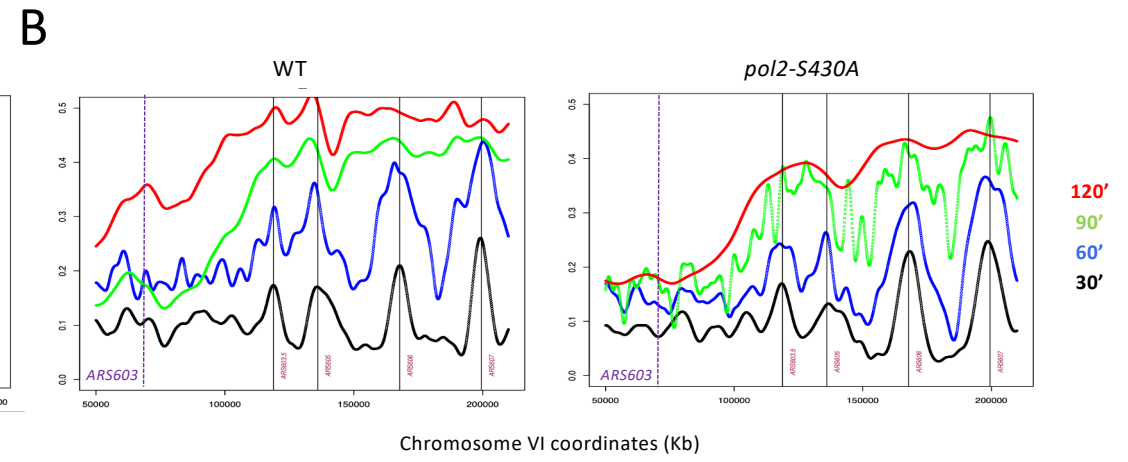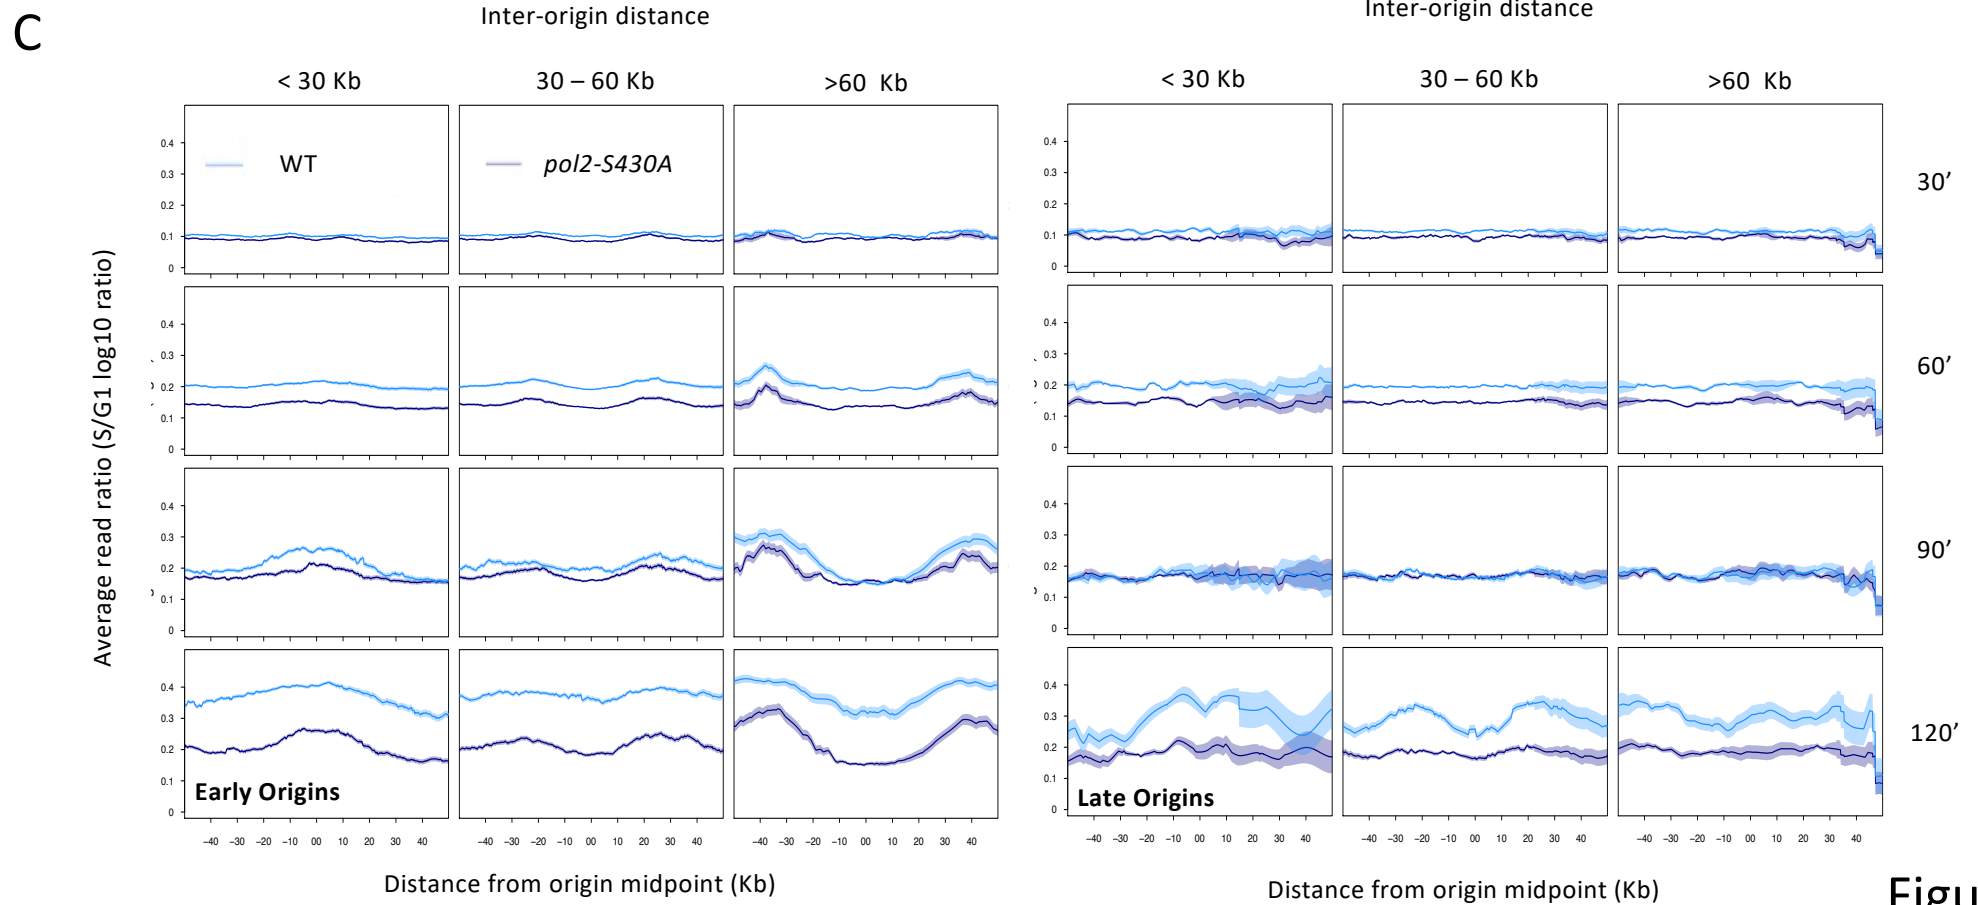

Figure S7

**Figure S7. Fork progression defects in HU-challenged *pol2-S430A* cells, Related to Figure 6. (A + B)**

CGS analysis of fork progression as in the experiment shown in Figure 6B. A 60-Kb region genomic region on chromosome III containing the early origins *ARS305* and *ARS306* (A) and a 150-Kb genomic region on chromosome VI containing early origins *ARS603.5*, *ARS605*, *ARS606* and *ARS607* and the late origin *ARS603* (in purple color) (B) are shown. (C) Average read ratios across genomic regions categorized by inter-origin distance in early and late/dormant origin datasets of wild type and *pol2-S430A* cells along the time course experiment shown in Figure 6B.



| Strain                                     | Number  | Genotype                                                                                                                                                             | Reference      |
|--------------------------------------------|---------|----------------------------------------------------------------------------------------------------------------------------------------------------------------------|----------------|
| WT                                         | RB 718  | <i>MATa, his3-11,15, leu2-3,112, trp1-1, ura3-1</i>                                                                                                                  | Lab collection |
| <i>Pol2-PK</i>                             | RB 1618 | <i>MATa, his3-11,15, leu2-3,112, trp1-1, ura3-1, POL2-6PK-HIS3MX6</i>                                                                                                | This study     |
| <i>Dpb2-Myc</i>                            | RB 1955 | <i>MATa, his3-11,15, leu2-3,112, trp1-1, ura3-1, DPB2-9MYC-HIS3MX6</i>                                                                                               | This study     |
| <i>Dpb3-myc</i>                            | RB 1958 | <i>MATa, his3-11,15, leu2-3,112, trp1-1, ura3-1, DPB3-9MYC-TRP1</i>                                                                                                  | This study     |
| <i>Dpb4-Flag</i>                           | RB 1985 | <i>MATa, his3-11,15, leu2-3,112, trp1-1, ura3-1, DPB4-FLAG-KANMX6</i>                                                                                                | This study     |
| <i>sml1 Δ Pol2-PK</i>                      | RB 1743 | <i>MATa, his3-11,15, leu2-3,112, trp1-1, ura3-1, POL2-6PK-HIS3MX6, sml1::TRP1</i>                                                                                    | This study     |
| <i>sml1 Δ Dpb2-Myc</i>                     | RB 2280 | <i>MATa, his3-11,15, leu2-3,112, trp1-1, ura3-1, DPB2-9MYC-HIS3MX6, sml1::TRP1</i>                                                                                   | This study     |
| <i>sml1 Δ Dpb3-Myc</i>                     | RB 2425 | <i>MATa, his3-11,15, leu2-3,112, trp1-1, ura3-1, DPB3-9MYC-TRP1, sml1::TRP1</i>                                                                                      | This study     |
| <i>sml1 Δ mec1 Δ tel1 Δ Pol2-PK</i>        | RB 1749 | <i>MATa, his3-11,15, leu2-3,112, trp1-1, ura3-1, POL2-6PK-HIS3MX6, sml1::TRP1, mec1::URA3, tel1::HPHMX6</i>                                                          | This study     |
| <i>sml1 Δ mec1 Δ tel1 Δ Dpb2-Myc</i>       | RB 2272 | <i>MATa, his3-11,15, leu2-3,112, trp1-1, ura3-1, DPB2-9MYC-HIS3MX6, sml1::TRP1, mec1::URA3, tel1::HPHMX6</i>                                                         | This study     |
| <i>sml1 Δ mec1 Δ tel1 Δ Dpb3-Myc</i>       | RB 2443 | <i>MATa, his3-11,15, leu2-3,112, trp1-1, ura3-1, DPB3-9MYC-TRP1, sml1::TRP1, mec1::URA3, tel1::HPHMX6</i>                                                            | This study     |
| <i>rad53-K227A Pol2-PK</i>                 | RB 2035 | <i>MATa, his3-11,15, leu2-3,112, trp1-1, ura3-1, POL2-6PK-HIS3MX6, rad53-K227A-KANMX6</i>                                                                            | This study     |
| <i>Pol2-HA</i>                             | RB 2841 | <i>MATa, his3-11,15, leu2-3,112, trp1-1, ura3-1, POL2-3HA-TRP1</i>                                                                                                   | This study     |
| <i>Dpb2-HA</i>                             | RB 2682 | <i>MATa, his3-11,15, leu2-3,112, trp1-1, ura3-1, DPB2-3HA-HIS3MX6</i>                                                                                                | This study     |
| <i>rad53-K227A Dpb2-HA</i>                 | RB 2700 | <i>MATa, his3-11,15, leu2-3,112, trp1-1, ura3-1, DPB2-3HA-HIS3MX6, rad53-K227A-KANMX6</i>                                                                            | This study     |
| <i>dun1 Δ Pol2-PK</i>                      | RB 3263 | <i>MATa, his3-11,15, leu2-3,112, trp1-1, ura3-1, POL2-6PK-HIS3MX6, dun1::KANMX6</i>                                                                                  | This study     |
| <i>dun1 Δ Dpb2-HA</i>                      | RB 3294 | <i>MATa, his3-11,15, leu2-3,112, trp1-1, ura3-1, DPB2-3HA-HIS3MX6, dun1::KANMX6</i>                                                                                  | This study     |
| <i>Pol3-PK</i>                             | RB 1621 | <i>MATa, his3-11,15, leu2-3,112, trp1-1, ura3-1, POL3-9PK-TRP1</i>                                                                                                   | This study     |
| <i>Pol31-Myc</i>                           | RB 1962 | <i>MATa, his3-11,15, leu2-3,112, trp1-1, ura3-1, POL31-9MYC-HIS3MX6</i>                                                                                              | This study     |
| <i>Pol32-Flag</i>                          | RB 1965 | <i>MATa, his3-11,15, leu2-3,112, trp1-1, ura3-1, POL32-FLAG-KANMX6</i>                                                                                               | This study     |
| <i>sml1 Δ Pol3-Myc</i>                     | RB 3413 | <i>MATa, his3-11,15, leu2-3,112, trp1-1, ura3-1, POL3-9MYC-TRP1, sml1::TRP1</i>                                                                                      | This study     |
| <i>sml1 Δ Pol31-Myc</i>                    | RB 2292 | <i>MATa, his3-11,15, leu2-3,112, trp1-1, ura3-1, POL31-9MYC-HIS3MX6, sml1::TRP1</i>                                                                                  | This study     |
| <i>sml1 Δ Pol32-Flag</i>                   | RB 2187 | <i>MATa, his3-11,15, leu2-3,112, trp1-1, ura3-1, POL32-FLAG-KANMX6, sml1::TRP1</i>                                                                                   | This study     |
| <i>sml1 Δ mec1 Δ tel1 Δ Pol3-Myc</i>       | RB 2250 | <i>MATa, his3-11,15, leu2-3,112, trp1-1, ura3-1, POL3-9MYC-TRP1, sml1::TRP1, mec1::URA3, tel1::HPHMX6</i>                                                            | This study     |
| <i>sml1 Δ mec1 Δ tel1 Δ Pol31-Myc</i>      | RB 2287 | <i>MATa, his3-11,15, leu2-3,112, trp1-1, ura3-1, POL31-9MYC-HIS3MX6, sml1::TRP1, mec1::URA3, tel1::HPHMX6</i>                                                        | This study     |
| <i>sml1 Δ mec1 Δ tel1 Δ Pol32-Flag</i>     | RB 2196 | <i>MATa, his3-11,15, leu2-3,112, trp1-1, ura3-1, POL32-FLAG-KANMX6, sml1::TRP1, mec1::URA3, tel1::HPHMX6</i>                                                         | This study     |
| <i>rad53-K227A</i>                         | RB 26   | <i>MATa, his3-11,15, leu2-3,112, trp1-1, ura3-1, rad53-K227A-KANMX6</i>                                                                                              | Lab collection |
| <i>rad53-K227A pol2-4</i>                  | RB 1490 | <i>MATa, his3-11,15, leu2-3,112, trp1-1, ura3-1, rad53-K227A-KANMX6, pol2-D290A-E292A</i>                                                                            | This study     |
| <i>rad53-K227A exo1 Δ</i>                  | RB 1568 | <i>MATa, his3-11,15, leu2-3,112, trp1-1, ura3-1, rad53-K227A-KANMX6, exo1::HIS3MX6</i>                                                                               | This study     |
| <i>rad53-K227A pol2-4 exo1 Δ</i>           | RB 1563 | <i>MATa, his3-11,15, leu2-3,112, trp1-1, ura3-1, rad53-K227A-KANMX6, pol2-D290A-E292A, exo1::HIS3MX6</i>                                                             | This study     |
| <i>rad53-K227A pol3-01</i>                 | RB 1436 | <i>MATa, his3-11,15, leu2-3,112, trp1-1, ura3-1, rad53-K227A-KANMX6, pol3-D520V</i>                                                                                  | This study     |
| <i>rad53-K227A pol2-4 pol3-01</i>          | RB 2788 | <i>MATa, his3-11,15, leu2-3,112, trp1-1, ura3-1, rad53-K227A-KANMX6, ppol2-D290A-E292A, pol3-D520V</i>                                                               | This study     |
| <i>rad53-K227A GAL-exo1-AID</i>            | RB 2447 | <i>MATa, his3-11,15, leu2-3,112, trp1-1, ura3-1, rad53-K227A-KANMX6, tir1::URA3, TRP1-GAL1-3HA-EXO1-AID-HPHMX6</i>                                                   | This study     |
| <i>rad53-K227A pol2-4 GAL-exo1-AID</i>     | RB 2936 | <i>MATa, his3-11,15, leu2-3,112, trp1-1, ura3-1, rad53-K227A-KANMX6, tir1::URA3, TRP1-GAL1-3HA-EXO1-AID-HPHMX6, pol2-D290A-E292A</i>                                 | This study     |
| <i>rad53-K227A pol3-D520V GAL-exo1-AID</i> | RB 3015 | <i>MATa, his3-11,15, leu2-3,112, trp1-1, ura3-1, rad53-K227A-KANMX6, tir1::URA3, TRP1-GAL1-3HA-EXO1-AID-HPHMX6, pol3-D520V</i>                                       | This study     |
| <i>sml1 Δ mec1 Δ</i>                       | RB 323  | <i>MATa, his3-11,15, leu2-3,112, trp1-1, ura3-1, sml1::TRP1, mec1::URA3</i>                                                                                          | Lab collection |
| <i>sml1 Δ mec1 Δ pol2-4</i>                | RB 2845 | <i>MATa, his3-11,15, leu2-3,112, trp1-1, ura3-1, sml1::TRP1, mec1::URA3, pol2-D290A-E292A</i>                                                                        | This study     |
| <i>sml1 Δ mec1 Δ exo1 Δ</i>                | RB 2838 | <i>MATa, his3-11,15, leu2-3,112, trp1-1, ura3-1, sml1::TRP1, mec1::URA3, exo1::HIS3MX6</i>                                                                           | This study     |
| <i>sml1 Δ mec1 Δ pol2-4 exo1 Δ</i>         | RB 2858 | <i>MATa, his3-11,15, leu2-3,112, trp1-1, ura3-1, sml1::TRP1, mec1::URA3, pol2-D290A-E292A, exo1::HIS3MX6</i>                                                         | This study     |
| <i>dun1 Δ</i>                              | RB 326  | <i>MATa, his3-11,15, leu2-3,112, trp1-1, ura3-1, dun1::KANMX6</i>                                                                                                    | This study     |
| <i>dun1 Δ pol2-4</i>                       | RB 3374 | <i>MATa, his3-11,15, leu2-3,112, trp1-1, ura3-1, dun1::KANMX6, pol2-D290A-E292A</i>                                                                                  | This study     |
| <i>dun1 Δ exo1 Δ</i>                       | RB 3371 | <i>MATa, his3-11,15, leu2-3,112, trp1-1, ura3-1, dun1::KANMX6, exo1::HIS3MX6</i>                                                                                     | This study     |
| <i>dun1 Δ pol2-4 exo1 Δ</i>                | RB 3394 | <i>MATa, his3-11,15, leu2-3,112, trp1-1, ura3-1, dun1::KANMX6, pol2-D290A-E292A, exo1::HIS3MX6</i>                                                                   | This study     |
| <i>rad53-K227A pol2 Δ pPOL2</i>            | RB 2910 | <i>MATa, his3-11,15, leu2-3,112, trp1-1, ura3-1, rad53-K227A-KANMX6, POL2::HPH, pRS415-POL2</i>                                                                      | This study     |
| <i>rad53-K227A pol2 Δ pPOL2-S430D</i>      | RB 3100 | <i>MATa, his3-11,15, leu2-3,112, trp1-1, ura3-1, rad53-K227A-KANMX6, POL2::HPH, pRS415-pol2-S430D</i>                                                                | This study     |
| <i>rad53-K227A pol2 Δ pPOL2 exo1 Δ</i>     | RB 2918 | <i>MATa, his3-11,15, leu2-3,112, trp1-1, ura3-1, rad53-K227A-KANMX6, POL2::HPH, pRS415-POL2, exo1::HIS3MX6</i>                                                       | This study     |
| <i>rad53-K227A pol2 Δ pPOL2-S430D</i>      | RB 3103 | <i>MATa, his3-11,15, leu2-3,112, trp1-1, ura3-1, rad53-K227A-KANMX6, POL2::HPH, pRS415-pol2-S430D, exo1::HIS3MX6</i>                                                 | This study     |
| <i>rad53-K227A pol2 Δ pPOL2-4</i>          | RB 3110 | <i>MATa, his3-11,15, leu2-3,112, trp1-1, ura3-1, rad53-K227A-KANMX6, POL2::HPH, pRS415-pol2-D290A-E292A, exo1::HIS3MX6</i>                                           | This study     |
| <i>pol2-S430A</i>                          | RB 3647 | <i>MATa, his3-11,15, leu2-3,112, trp1-1, ura3-1, pol2-S430A</i>                                                                                                      | This study     |
| <i>pol2-S430D</i>                          | RB 3479 | <i>MATa, his3-11,15, leu2-3,112, trp1-1, ura3-1, pol2-S430D</i>                                                                                                      | This study     |
| <i>pol2-4</i>                              | RB 1292 | <i>MATa, his3-11,15, leu2-3,112, trp1-1, ura3-1, pol2-D290A-E292A</i>                                                                                                | This study     |
| <i>pol2-4-S430A</i>                        | RB 3758 | <i>MATa, his3-11,15, leu2-3,112, trp1-1, ura3-1, pol2-D290A-E292A-S430A</i>                                                                                          | This study     |
| <i>GAL-Pol ε</i>                           | RB 3649 | <i>MATa, his3-11,15, leu2-3,112, trp1-1, ura3-1, bar1::HYG, pep4::KANMX6, POL2-3FLAG-NAT, ura3::URA3pRS306/Dpb2, Dpb3, trp1::TRP1pRS304/POL2, Dpb4-Tev-CBP</i>       | J. Yeeles      |
| <i>GAL-Pol ε-Pol2-S430D</i>                | RB 3652 | <i>MATa, his3-11,15, leu2-3,112, trp1-1, ura3-1, bar1::HYG, pep4::KANMX6, POL2-3FLAG-NAT, ura3::URA3pRS306/Dpb2, Dpb3, trp1::TRP1pRS304/pol2-S430D, Dpb4-Tev-CBP</i> | This study     |
| <i>GAL-Pol ε-Pol2-S430A</i>                | yJY109  | <i>MATa, his3-11,15, leu2-3,112, trp1-1, ura3-1, bar1::HYG, pep4::KANMX6, POL2-3FLAG-NAT, ura3::URA3pRS306/Dpb2, Dpb3, trp1::TRP1pRS304/pol2-S430A, Dpb4-Tev-CBP</i> | This study     |

Table S1. Strains used in this study.
